# Supplementary material
Source: HighWire-hosted journal article supplement (https://bmjopen.bmj.com/content/15/1/e089503)
Supplement: inline-supplementary-material-1 [file inline-supplementary-material-1.pdf]

Title: A community-based pilot study exploring links between health, spirituality, and wellbeing within the Métis Nation of Alberta – Region 3  
Principal and Co-Investigator: Ginn, C.S., and Ginn, C.W.C.  
Ethics ID: REB18-0433

Study ID \_\_\_\_\_ Date of Birth: \_\_\_\_\_

Members, leaders, and Elders of the MNA – Region 3 have met together to develop these questions/questionnaire/survey.

Please check off areas of interest to you:

|                          |                                                                       |
|--------------------------|-----------------------------------------------------------------------|
| <input type="checkbox"/> | Prison ministries                                                     |
| <input type="checkbox"/> | Addiction                                                             |
| <input type="checkbox"/> | Spirituality                                                          |
| <input type="checkbox"/> | Blending different cultural practices                                 |
| <input type="checkbox"/> | Blending different spiritual practices                                |
| <input type="checkbox"/> | Cultural immersion                                                    |
| <input type="checkbox"/> | Traditional knowledge                                                 |
| <input type="checkbox"/> | Learning in community                                                 |
| <input type="checkbox"/> | Spirituality as a tool for healing                                    |
| <input type="checkbox"/> | Cultural history as a tool for healing                                |
| <input type="checkbox"/> | Elder’s role in healing (physical)                                    |
| <input type="checkbox"/> | Elder’s role in healing (spiritual)                                   |
| <input type="checkbox"/> | Reconciliation (government)                                           |
| <input type="checkbox"/> | Reconciliation (church)                                               |
| <input type="checkbox"/> | Forgiveness (government)                                              |
| <input type="checkbox"/> | Forgiveness (church)                                                  |
| <input type="checkbox"/> | Passing on both(?) Métis traditions and culture to younger generation |
| <input type="checkbox"/> | Nutrition for mental wellness (for example Diabetes/Mental health)    |

Title: A community-based pilot study exploring links between health, spirituality, and wellbeing within the Métis Nation of Alberta – Region 3  
Principal and Co-Investigator: Ginn, C.S., and Ginn, C.W.C.  
Ethics ID: REB18-0433

|                          |                                 |
|--------------------------|---------------------------------|
| <input type="checkbox"/> | Nutrition for physical wellness |
| <input type="checkbox"/> | Land claims                     |
| <input type="checkbox"/> | Harvesting rights               |
| <input type="checkbox"/> | Learning language               |
| <input type="checkbox"/> | Preserving language             |
| <input type="checkbox"/> | Pilgrimages to sacred sites     |

Please use the next few pages to write about any of the topics you checked off above.

Additional Questions:

- (1) Are there ways that you see your health, spirituality, and wellbeing as connected?
- (2) What are the most important things you have done in your lifetime that have impacted your health?
- (3) Are there ways that your Métis identity affects your health, spirituality, or wellbeing?
- (4) How do you blend different religious or spiritual practices to maintain your health, spirituality, or wellbeing?
- (5) Are there any other areas you want to write about related to health, spirituality, and wellbeing?
